# Supplementary material
Source: PubMed Central journal article supplement (PMC10828338)

**Supplemental Table 8****DIALib-QC assessment report of the Mouse hybrid T6 spectral assay library.**

| <b>library</b>  | <b>Mouse-tissue-Project-specific_Lukas-Resource-Hybrid-T6-Library.xls</b> | <b>Name of library file being analyzed</b>                                 |
|-----------------|---------------------------------------------------------------------------|----------------------------------------------------------------------------|
| format          | Spectronaut                                                               | Library format, one of OpenSWATH, PeakView, or Spectronaut                 |
| peptions        | 455814                                                                    | Number of peptide ions (i.e. precursor, sequence + modifications + charge) |
| fragments       | 9981770                                                                   | Number of fragment (fragment ions) in library                              |
| ptp_percent     | 100                                                                       | Percentage of proteotypic peptions (not shared)                            |
| shared_percent  | 0                                                                         | Percentage of shared peptide ions (peptions)                               |
| shared_peptions | 0                                                                         | Number of shared peptions                                                  |
| peptides        | 175952                                                                    | Number of distinct peptide sequences                                       |
| mod_peps        | 332402                                                                    | Number of distinct modified peptides (sequences + modifications)           |
| mod_percent     | 60.6                                                                      | percentage of distinct modified peptides with a mass modification          |
| total_mods      | 366023                                                                    | Number of mass modified amino acids                                        |
| chg_2           | 23.1                                                                      | Percentage of charge 2 precursors                                          |
| chg_3           | 40.2                                                                      | Percentage of charge 3 precursors                                          |
| precursor_min   | 380                                                                       | Minimum precursor <i>m/z</i> (mass/charge) in library                      |
| precursor_max   | 1251.2                                                                    | Maximum precursor <i>m/z</i> in library                                    |

|                          |          |                                                                                            |
|--------------------------|----------|--------------------------------------------------------------------------------------------|
| fragment_min             | 199.1    | Minimum fragment <i>m/z</i> in library                                                     |
| fragment_max             | 1699.9   | Maximum fragment <i>m/z</i> in library                                                     |
| avg_len                  | 18.5     | Average peptide Length                                                                     |
| avg_num_frags            | 21.9     | Average number of fragments per assay (precursor)                                          |
| avg_frag_len             | 1.18     | Average fragment sequence length                                                           |
| short_perc               | 100      | Percentage of assays with 5 or fewer transitions                                           |
| fragment_above_precursor | 0.582    | Percentage of fragment <i>m/z</i> above precursor <i>m/z</i>                               |
| y_perc                   | 61.3     | Percentage of y ions                                                                       |
| b_perc                   | 38.7     | Percentage of b ions                                                                       |
| t6_y_perc                | 61.7     | Percentage of y ions considering only the top 6 fragments per assay                        |
| avg_intensity            | 0        | Average Intensity                                                                          |
| rt_min                   | -10790.2 | Minimum RT (retention time) in library                                                     |
| rt_max                   | 572.2    | Maximum RT in library                                                                      |
| rt_med                   | 41.9     | Median RT in library                                                                       |
| rt_rsqa                  | 1        | r-squared value of fit between RT of +2 and +3 charge states for the same modified peptide |
| rt_five                  | 100      | Percentage of +2/+3 charge pairs of the same mod pep within 5 RT units of each other       |
| n_irt                    | 11       | Number of iRT peptides in library                                                          |

|                   |       |                                                                                   |
|-------------------|-------|-----------------------------------------------------------------------------------|
| irt_cnt           | 614   | Number of iRT assays (precursor + fragment)                                       |
| low_nr            | 0     | Number of fragments annotated as y1,y2,b1, or b2                                  |
| db_peps           | 0     | Peptides in reference library, often 7-50 AA                                      |
| seen_peps         | 0     | Number of library peptides seen                                                   |
| mc_peps           | 75590 | Number of Missed cleavage peptides                                                |
| db_prots          | 0     | Number of Proteins in reference library                                           |
| lib_prots         | 10821 | Number of proteins with at least one assay in ion library                         |
| seen_prots        | N/A   | Number of library proteins seen                                                   |
| ux_prots          | N/A   | Unexplained (not in reference library) proteins                                   |
| decoy_pct         | 0     | Percentage of decoy (optionally includes "alternative", non-db decoys) assays     |
| mixed_pct         | 0     | Percentage of mixed decoy/target (has both decoy and no-decoy annotations) assays |
| fwd_pct           | 100   | Percentage of target (non-decoy) assays                                           |
| med_ppp           | 18    | Median number of pepions per protein                                              |
| mean_ppp          | 42.1  | Mean number of pepions per protein                                                |
| stddev_ppp        | 96    | Standard deviation of the number of pepions per protein                           |
| 3_sigma_ppp       | 112   | number of pepions per protein more than 3 standard deviations from the mean       |
| max_intensity_idx | 1     | Average index of most intense fragment                                            |

|                   |         |                                                                                                                              |
|-------------------|---------|------------------------------------------------------------------------------------------------------------------------------|
| precursor_ok      | 455814  | Number of assays where precursor is within 5 ppm (parts per million $m/z$ ) of theoretical                                   |
| precursor_bad     | 0       | Number of assays where precursor is more than 5 ppm from theoretical                                                         |
| fragment_ok       | 9981770 | Number of assays where fragment is within 1 ppm of theoretical                                                               |
| fragment_bad      | 0       | Number of assays where fragment is more than 1 ppm from theoretical                                                          |
| fragment_na       | 0       | Number of assays where peak annotation not found in expected b/y series                                                      |
| fragment_avg_mdif | 0       | Average $m/z$ difference between reported and theoretical fragment                                                           |
| problem_assays    | 0       | Assays whose precursor or any fragment $m/z$ values do not match SWATHs file or differ significantly from theoretical values |
| im_min            | 0.6155  | Minimum ion mobility reported in library                                                                                     |
| im_max            | 1.5881  | Maximum ion mobility reported in library                                                                                     |

**A** Precursor  $m/z$ 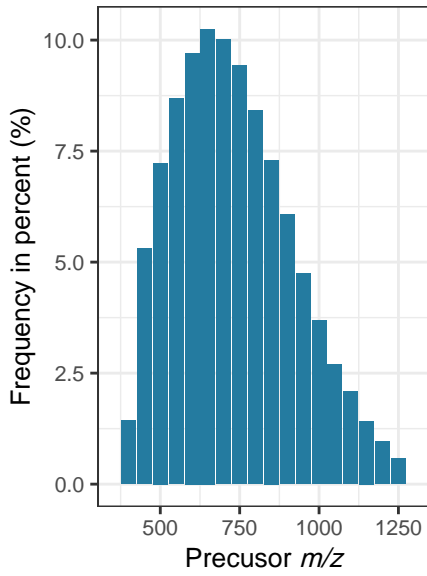**B** Precursor charge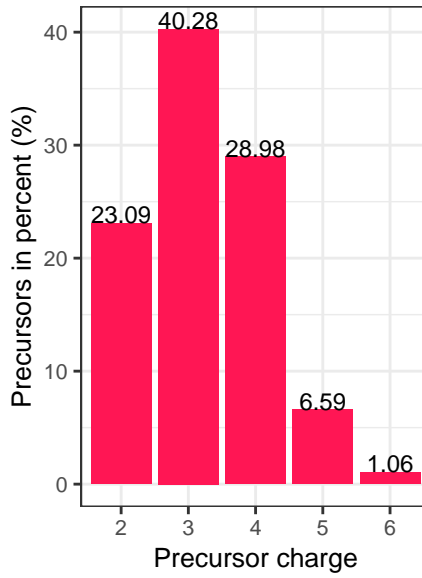**C** iRT correlation  $R^2=1$   $n=59768$ 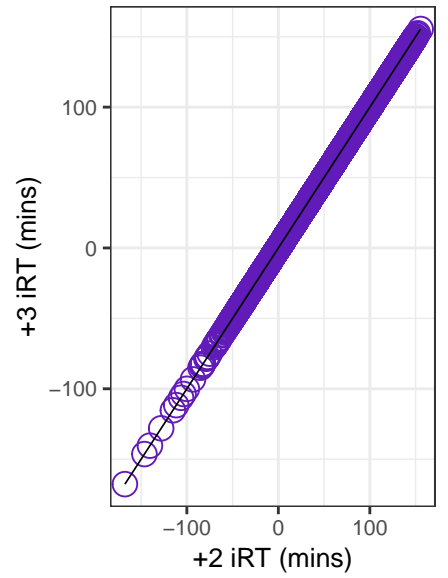**D** Peptide length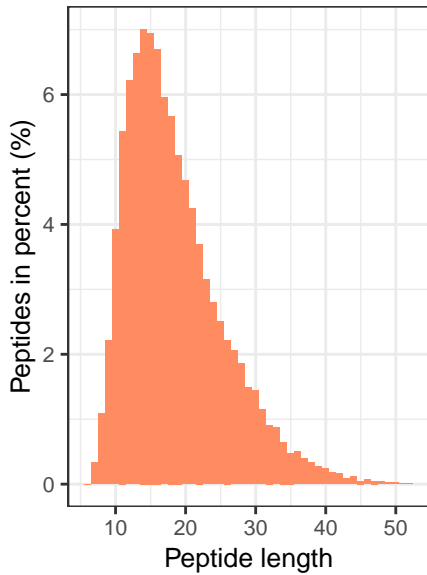**E** Modifications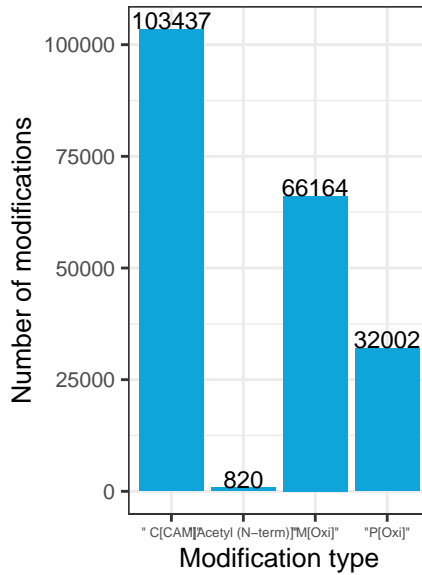**F** Peptides per protein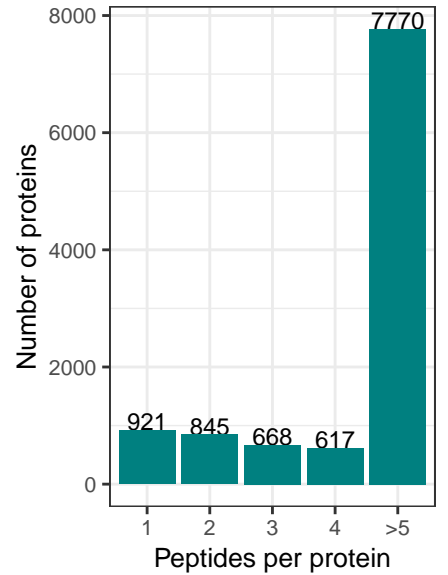**G** Fragments per Precursor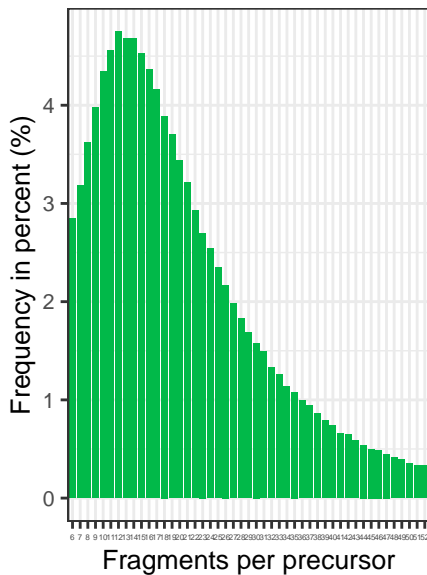**H** Fragment ion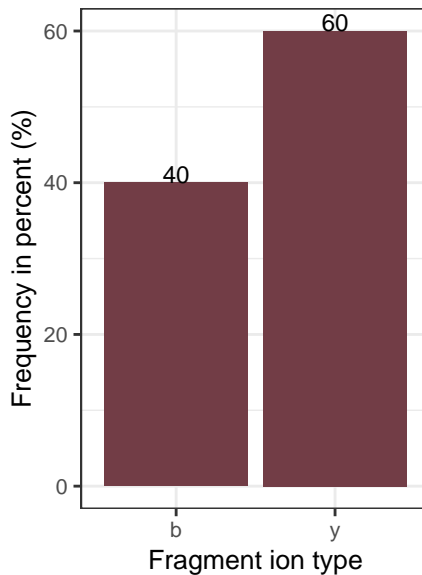**I** Fragment ion charge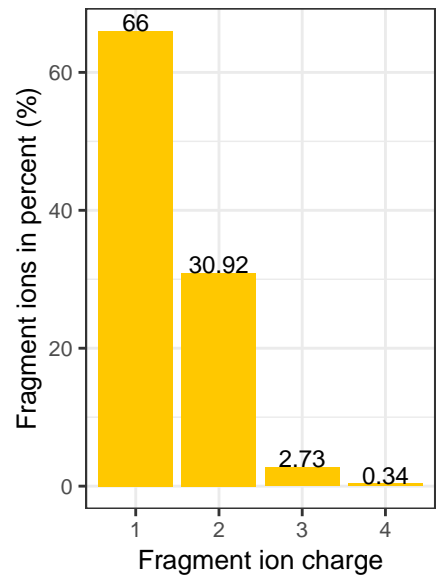

Supplement: 11357_2023_917_MOESM18_ESM.pdf [file 11357_2023_917_MOESM18_ESM.pdf]
